# Supplementary material for: Manufacturing of Complex Silicon–Carbon Structures: Exploring SixCy Materials
Source: MDPI journal article supplement (doi:10.3390/ma15103475), 2022-05-12
Supplement: s1 [file s1]

## Supporting information

### Manufacturing of Complex Silicon–Carbon Structures: Exploring SixCy Materials

Skyler Oglesby<sup>1</sup>, Sergei A Ivanov<sup>2</sup>, Alejandra Londoño-Calderon<sup>2</sup>, Douglas Pete<sup>3</sup>, Michael Thompson Pettes<sup>2</sup>, Andrew Crandall Jones<sup>2</sup> and Sakineh Chabi<sup>1\*</sup>

<sup>1</sup>Department of Mechanical Engineering, University of New Mexico, Albuquerque, NM 87131, USA

<sup>2</sup> Materials Physics and Application Division, Los Alamos National Laboratory, Los Alamos, NM 87545, USA

<sup>3</sup> Sandia National Laboratories, Albuquerque, NM 87123, USA

\* Email: schabi@unm.edu

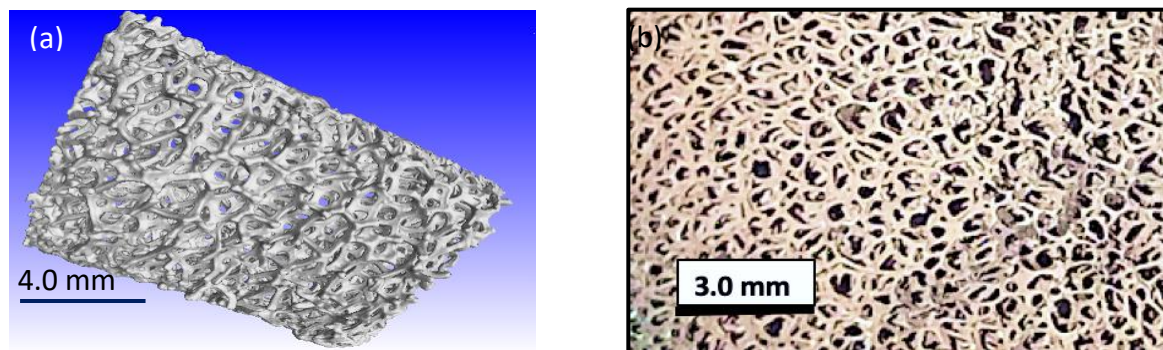

*Figure S1. (a) SEM images from the graphene foam precursor, and (b) photograph from the produced Si/C foam.*

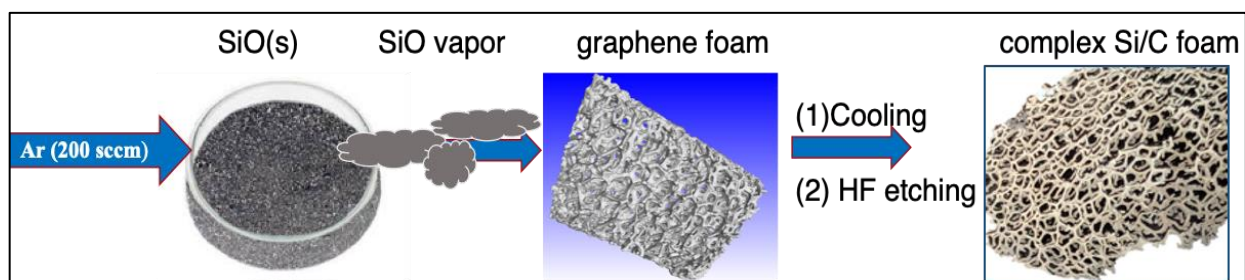

Figure S2. A schematic of the CVD synthesis of the foam.

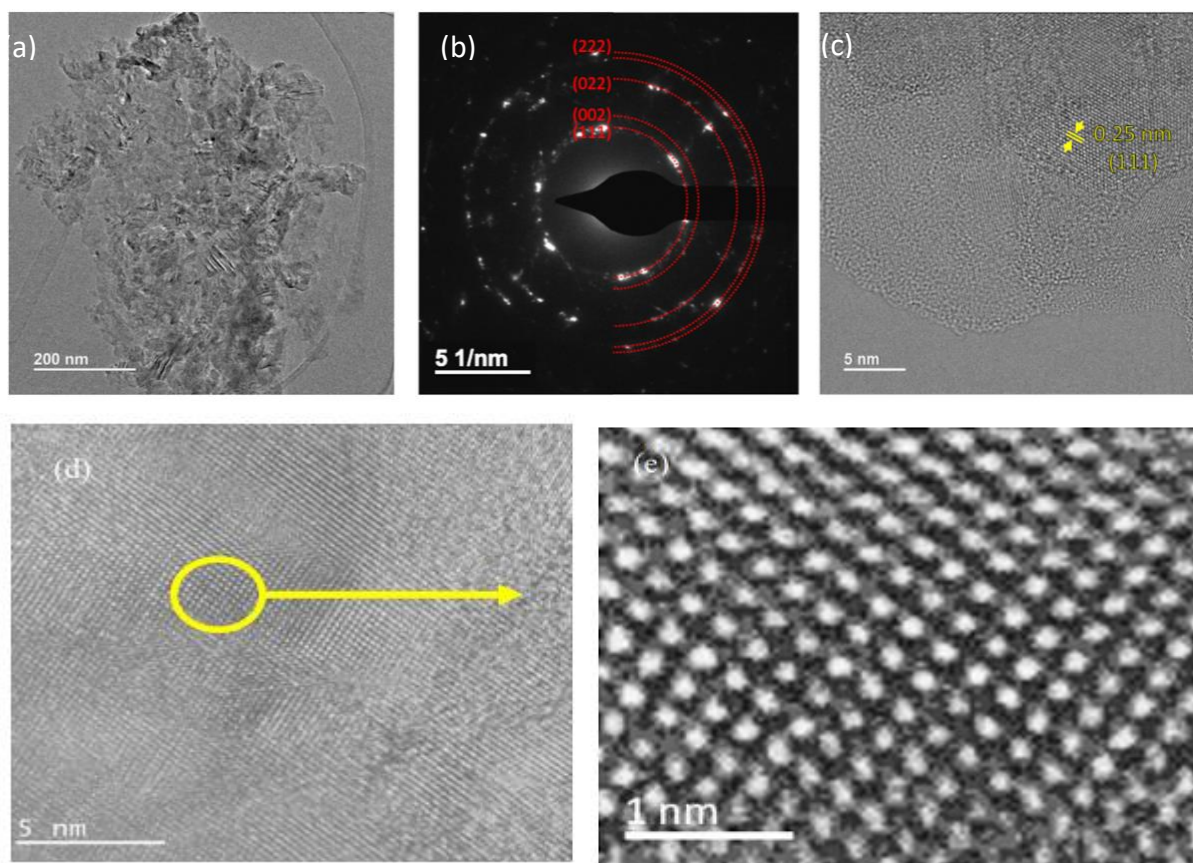

Figure S3. (a) TEM image and (b) indexed selected area electron diffraction pattern from a polycrystalline portion of the sample. (c-e) TEM images from different samples showing local crystalline order.

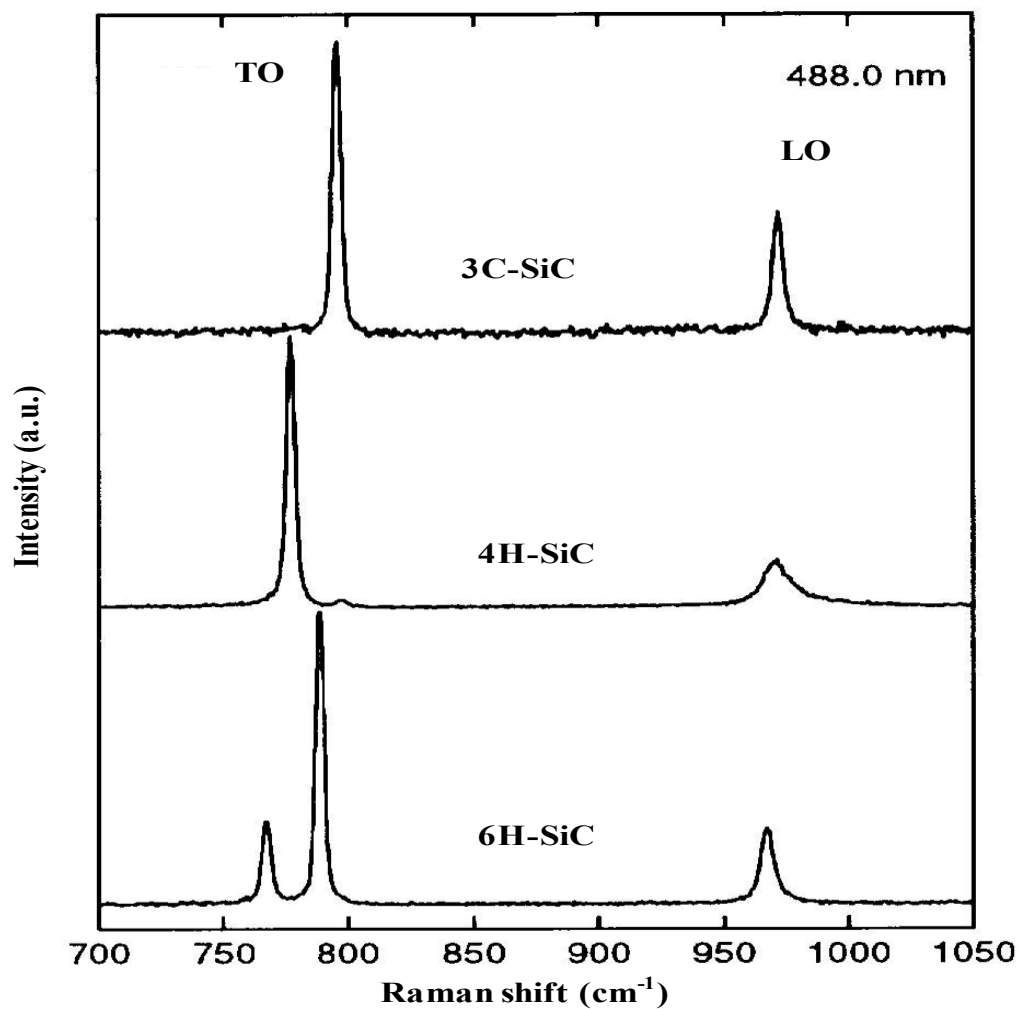

Figure S4. Raman spectra of different polytypes of SiC<sup>1</sup>. Reproduced with permission from Elsevier. Copyright 2015. Published by Elsevier Ltd.

**Reference:**

- (1) Cantarero, A. Raman Scattering Applied to Materials Science. *Procedia Mater. Sci.* **2015**, 9, 113–122.
